# Supplementary material for: Oxidation of Hydrogen Sulfide by Quinones: How Polyphenols Initiate Their Cytoprotective Effects
Source: Int J Mol Sci. 2021 Jan 19;22(2):961. doi: 10.3390/ijms22020961 (PMC7835830; doi:10.3390/ijms22020961)
Supplement: Supplementary file 1 [file ijms-22-00961-s001.pdf]

## **Supplemental Information**

### **Oxidation of Hydrogen Sulfide by Quinones: How Polyphenols Initiate Their Cytoprotective Effects**

Kenneth R. Olson<sup>a,b</sup>, Yan Gao<sup>a</sup> and Karl D. Straub<sup>c,d</sup>

a. Indiana University School of Medicine - South Bend Center, South Bend, Indiana 46617 USA

b. Department of Biological Sciences, University of Notre Dame, Notre Dame IN 46556

c Central Arkansas Veteran's Healthcare System, Little Rock, AR 72205, USA

d Departments of Medicine and Biochemistry, University of Arkansas for Medical Sciences, Little Rock, AR 72202, USA

#### **Running Head: Sulfur Metabolism by Quinones**

#### **Address correspondence to:**

Kenneth R. Olson, Ph.D.  
Indiana University School of Medicine -South Bend  
Raclin Carmichael Hall  
1234 Notre Dame Avenue  
South Bend, IN 46617  
**Phone:** (574) 631-7560  
**Fax:** (574) 631-7821  
**e-mail:** [kolson@nd.edu](mailto:kolson@nd.edu)

## Supplemental Figures

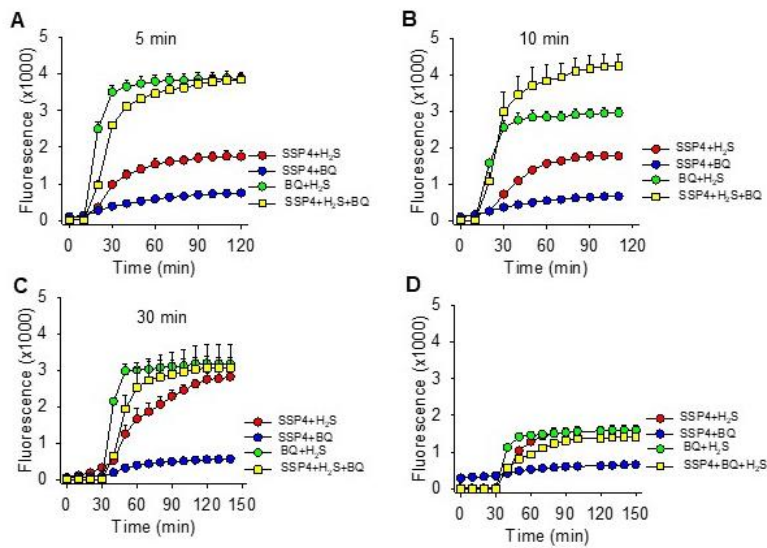

**Supplemental Figure S1.** Polysulfide formation (SSP4 fluorescence) after 5 (**A**), 10 (**B**) or 30 (**C**) min delayed addition of one of the three substrates in the reaction of 5  $\mu$ M SSP4, 100  $\mu$ M *p*-benzoquinone (BQ) and 300  $\mu$ M H<sub>2</sub>S compared to rapid sequential addition of SSP4, H<sub>2</sub>S and BQ (SSP4+H<sub>2</sub>S+BQ). Initial two substrates are shown in figure. The rate of polysulfide formation was greatest when BQ and H<sub>2</sub>S were added prior to SSP4. (**D**) Adding BQ to SSP4 prior to H<sub>2</sub>S nearly completely prevented the increase in SSP4 fluorescence. Sequential addition of SSP4, H<sub>2</sub>S and BQ was sufficient to overcome the inhibitory effect of BQ. Mean +SE,  $n = 4$  wells per treatment.

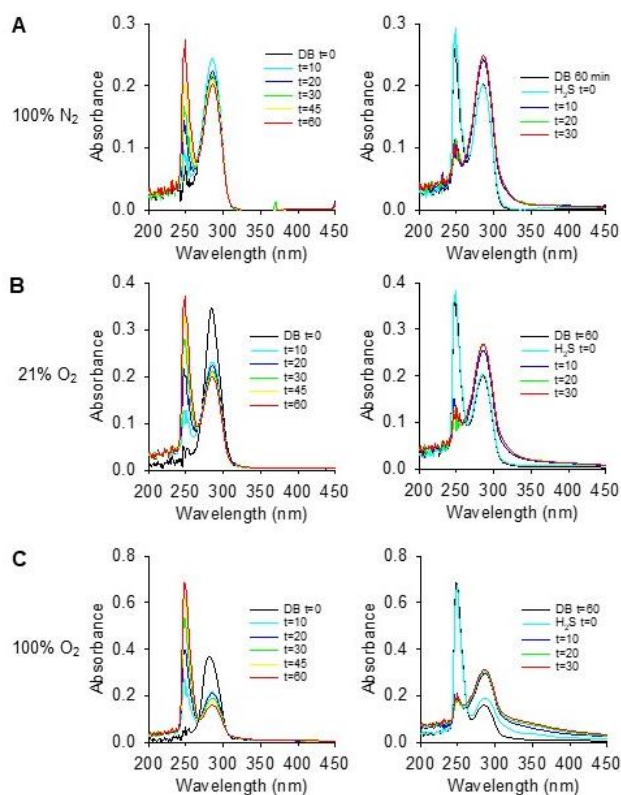

**Supplemental Figure S2.** Effects of O<sub>2</sub> alone (left panels) and in combination with 100  $\mu$ M H<sub>2</sub>S (right panels) on absorption spectra of 100  $\mu$ M 1,4-dihydroxybenzamine (DB). Buffer was bubbled with 100% N<sub>2</sub> (**A**), 21% O<sub>2</sub> (**B**) or 100% O<sub>2</sub> (**C**) for 20 min prior to addition of compounds. In 100% N<sub>2</sub> there is only a slight decrease in absorption at 289 nm indicating very little oxidation of DB; a slight amount of BQ (249 peak) is also observed. Addition of 100  $\mu$ M H<sub>2</sub>S reduces nearly all of this BQ to DB. As the percent O<sub>2</sub> increases there is a progressive increase in DB oxidation shown by the decrease in the 289 nm peak and increase in the 249 peak (note increase in absorbance axis with increasing O<sub>2</sub>). BQ was reduced to DB after addition of H<sub>2</sub>S.

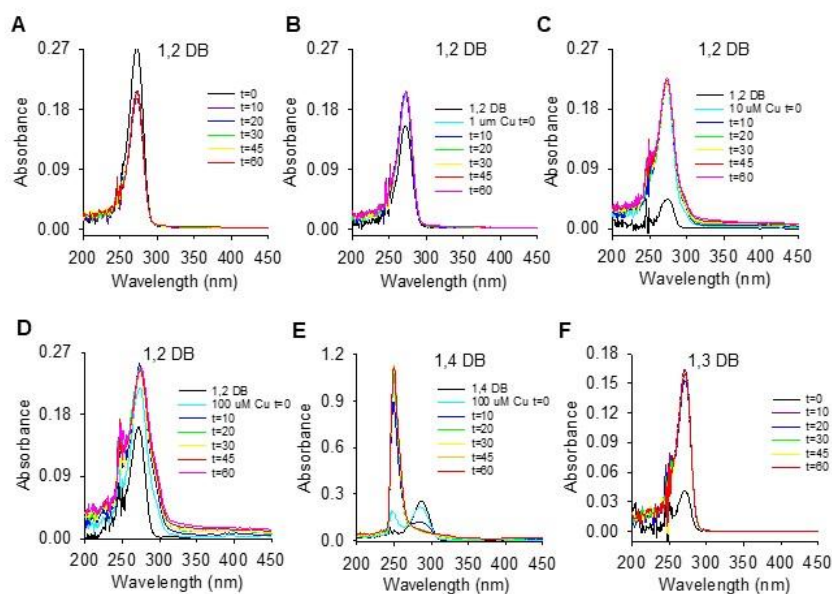

**Supplemental Figure S3.** Spectral analysis of autoxidation of dihydroxybenzenes. 1,2-dihydroxybenzene (1,2DB) is not autoxidized in 21% O<sub>2</sub> (A) nor in 21% O<sub>2</sub> in the presence of 1, 10 or 100  $\mu$ M CuCl<sub>2</sub> (B-D), whereas 1,4-DB is readily oxidized by 100  $\mu$ M CuCl<sub>2</sub> (E). (F) 1,3-DB is not autoxidized in 21% O<sub>2</sub>.

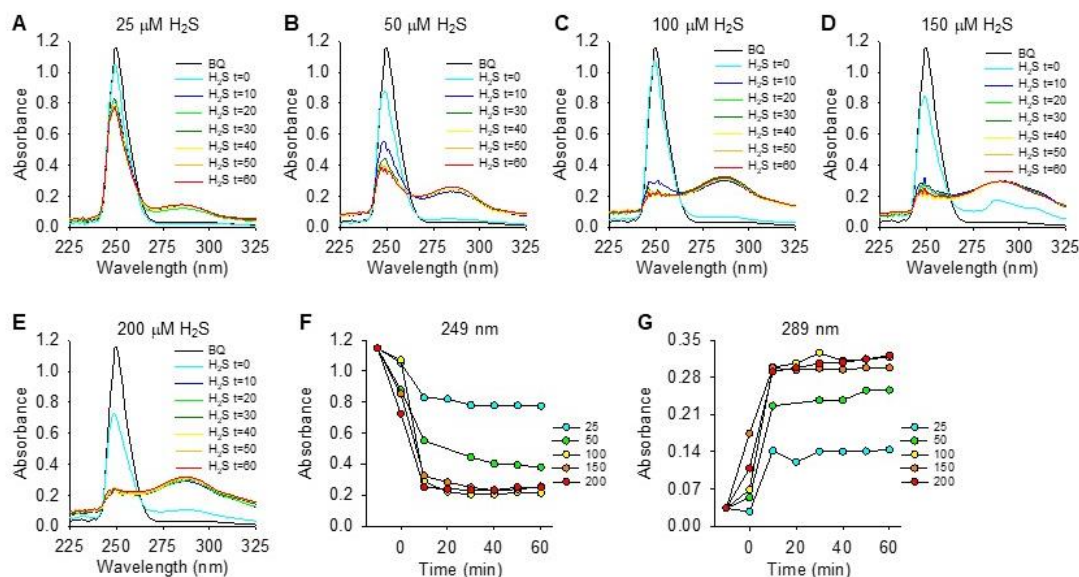

**Supplemental Figure S4.** Effects of increasing  $\text{H}_2\text{S}$  concentration (25-200  $\mu\text{M}$ , **A-E**, respectively) on the absorption spectra of 100  $\mu\text{M}$  1,4-benzoquinone (BQ). The BQ absorbance peak at 249 nm is concentration-dependently eliminated and replaced by a peak at 289 nm consistent with formation of 1,4-dihydrobenzene when  $\text{H}_2\text{S} > 100 \mu\text{M}$ . (**F-G**) show time course of absorption spectra at 249 and 289 nm, respectively at different  $\text{H}_2\text{S}$  concentrations; BQ spectrum prior to  $\text{H}_2\text{S}$  is shown at -15 min. The reaction is essentially complete by 10 min when  $\text{H}_2\text{S} > 50 \mu\text{M}$ .

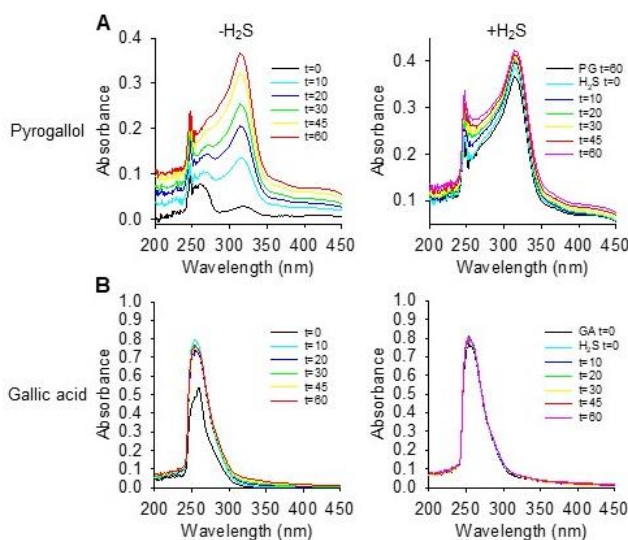

**Supplemental Figure S5.** Absorption spectra of 100  $\mu\text{M}$  pyrogallol (PG; **A**) and 100  $\mu\text{M}$  gallic acid (GA; **B**) in 21%  $\text{O}_2$  for 60 min before (left panels) and 60 min after addition of 300  $\mu\text{M}$   $\text{H}_2\text{S}$  (right panels). An initial PG peak at  $\sim 560 \text{ nm}$  decreases in 21%  $\text{O}_2$  and is replaced by a strong absorbance peak at 320 nm that is not affected by subsequent addition of  $\text{H}_2\text{S}$ . The absorbance peak of GA at 260 nm appears to be unaffected by exposure to either  $\text{O}_2$  or  $\text{H}_2\text{S}$ .

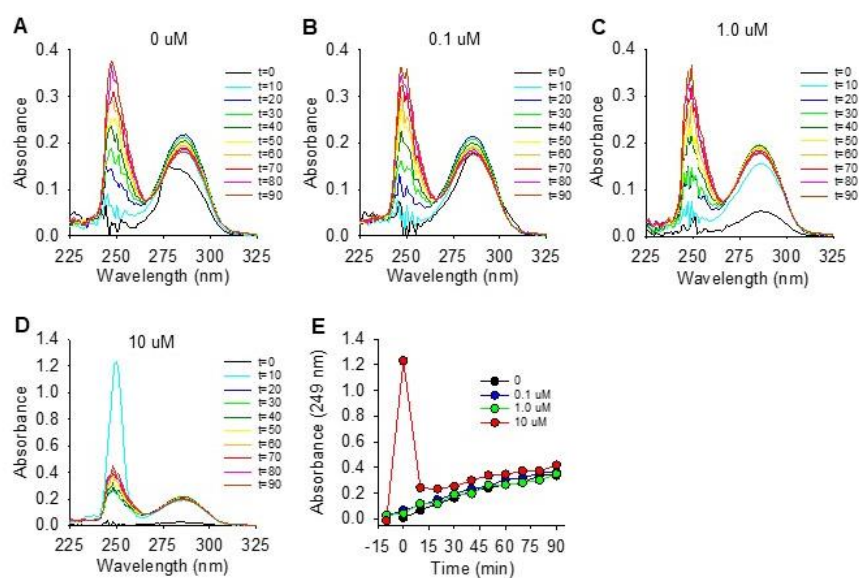

**Supplemental Figure S6.** (A-D) Absorption spectra of 100  $\mu\text{M}$  1,4-dihydroxybenzamine (DB) and variable concentrations of 1,4-benzoquinone (BQ). (E) Time-dependent absorption at 249 nm as a function of BQ concentration.

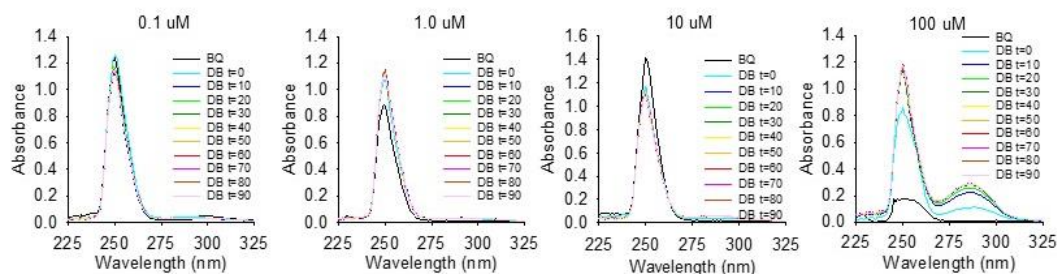

**Supplemental Figure S7.** Absorption spectra of 100  $\mu\text{M}$  1,4-benzoquinone (BQ) and variable concentrations of 1,4-dihydroxybenzamine (DB).

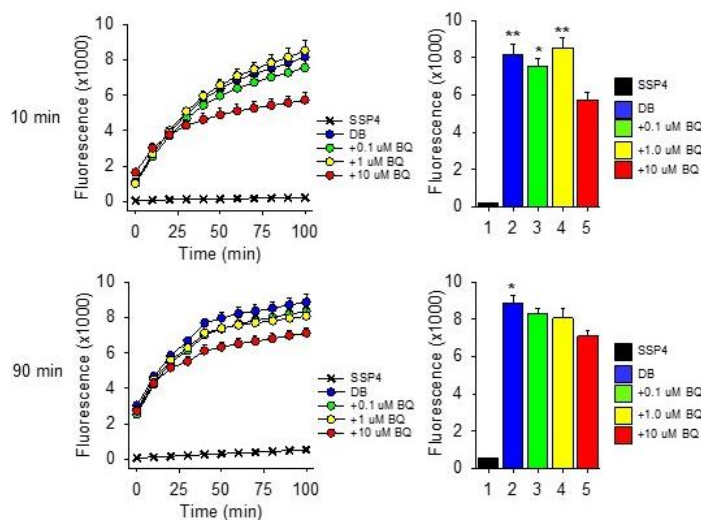

**Supplemental Figure S8.** Effects of variable 1,4-benzoquinone (BQ) concentration on polysulfide production (SSP4 fluorescence) by 100  $\mu$ M 1,4 dihydroxybenzene (DB) and 300  $\mu$ M  $H_2S$ . DB and BQ were added and allowed to react for 10 min (**A**) or 90 min (**B**) prior to addition of  $H_2S$ ; SSP4 was added 10 min after  $H_2S$ . Neither 0.1 nor 1.0  $\mu$ M BQ affected polysulfide production compared to 0  $\mu$ M BQ, whereas 10  $\mu$ M BQ inhibited it irrespective of DB-BQ incubation period. Mean  $\pm$ SE  $n=4$  wells per treatment; \*,  $p<0.05$ ; \*\*,  $p<0.01$ , significantly different from 10  $\mu$ M BQ.

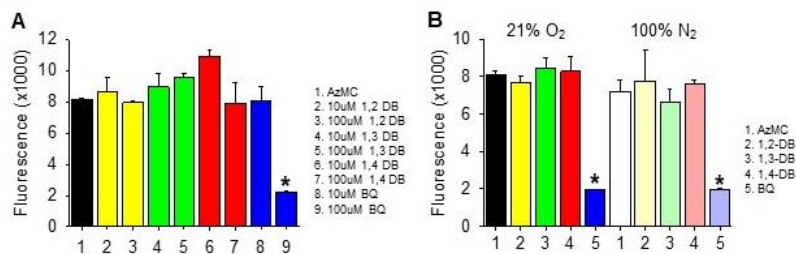

**Supplemental Figure S9.** Neither dihydroxybenzenes (DB) nor *p*-benzoquinone (BQ) produce  $H_2S$  (AzMC fluorescence) from 300  $\mu$ M mixed polysulfide ( $K_2S_n$ ) in 21%  $O_2$  or 100%  $N_2$ . (**A**)

Effects of 10 and 100  $\mu\text{M}$  DB and BQ at 21%  $\text{O}_2$ . **(B)** comparison of 100  $\mu\text{M}$  DB and BQ at 21%  $\text{O}_2$  and 100 %  $\text{N}_2$ . BQ at 100  $\mu\text{M}$  significantly ( $p < 0.001$ ) inhibited AzMC fluorescence in all instances suggesting BQ inhibits the reaction between  $\text{H}_2\text{S}$  (present in  $\text{K}_2\text{S}_n$ ) and the fluorophore. Bar graphs show fluorescence at 130 min. Mean  $\pm$  SE,  $n = 4$  wells per treatment; \*,  $p < 0.001$  compared to AzMC with  $\text{K}_2\text{S}_n$  (AzMC).

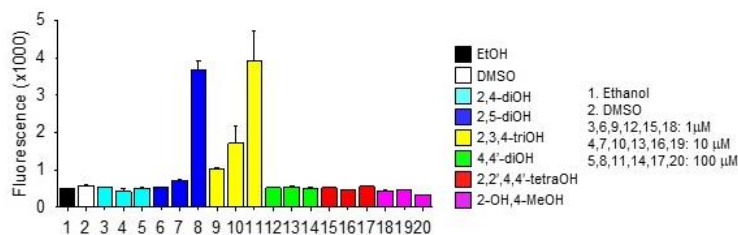

**Supplemental Figure S10.** Polysulfide production (SSP4 fluorescence) after 120 min incubation from 300  $\mu\text{M}$   $\text{H}_2\text{S}$  by di-, tri, and tetra-hydroxyphenones and 2-hydroxy,4methoxyphenone. Only 2,5-dihydroxyphenone and 2,3,4-trihydroxyphenone oxidized  $\text{H}_2\text{S}$  to polysulfides. Phenone concentration (1, 10, 100  $\mu\text{M}$ ) increases from left to right; mean  $\pm$  SE;  $n = 4$ .
